# Supplementary material for: CFTR Expression Analysis for Subtyping of Human Pancreatic Cancer Organoids
Source: Stem Cells Int. 2019 May 2;2019:1024614. doi: 10.1155/2019/1024614 (PMC6525827; doi:10.1155/2019/1024614)
Supplement: Supplementary 1 — Supplementary Figure S1: confocal CFTR and KRT81 immunofluorescence analysis of human PDAC organoids. CFTR and KRT81 immunofluorescent stainings of eight additional PDAC organoid lines. Lines were classified as CFTR+/KRT81− (DD314, DD376, DD394, and DD442), CFTR−/KRT81+ (DD439 and NR006), CFTR−/KRT81− (NR005), and CFTR+/KRT81+ (NR002). Scale bars represent 200 μm. [file 1024614.f1.zip]

Archive with 4 entries (4 files):
- Suppl. Figure 1_1_SCI_2702901.eps
- Suppl. Figure 1_2_SCI_2702902.eps
- Suppl. Figure 1_3_SCI_2702904.eps
- Suppl. Figure 1_4_SCI_2702905.eps
